# Supplementary material for: Bacterial Carriers for Glioblastoma Therapy
Source: PubMed Central journal article supplement (PMC5363759; doi:10.1016/j.omto.2016.12.003), 2016-12-14
Supplement: mmc1.pdf [file mmc1.pdf]

**OMTO, Volume 4**

## **Supplemental Information**

### **Bacterial Carriers for Glioblastoma Therapy**

**Nalini Mehta, Johnathan G. Lyon, Ketki Patil, Nassir Mokarram, Christine Kim, and Ravi V. Bellamkonda**

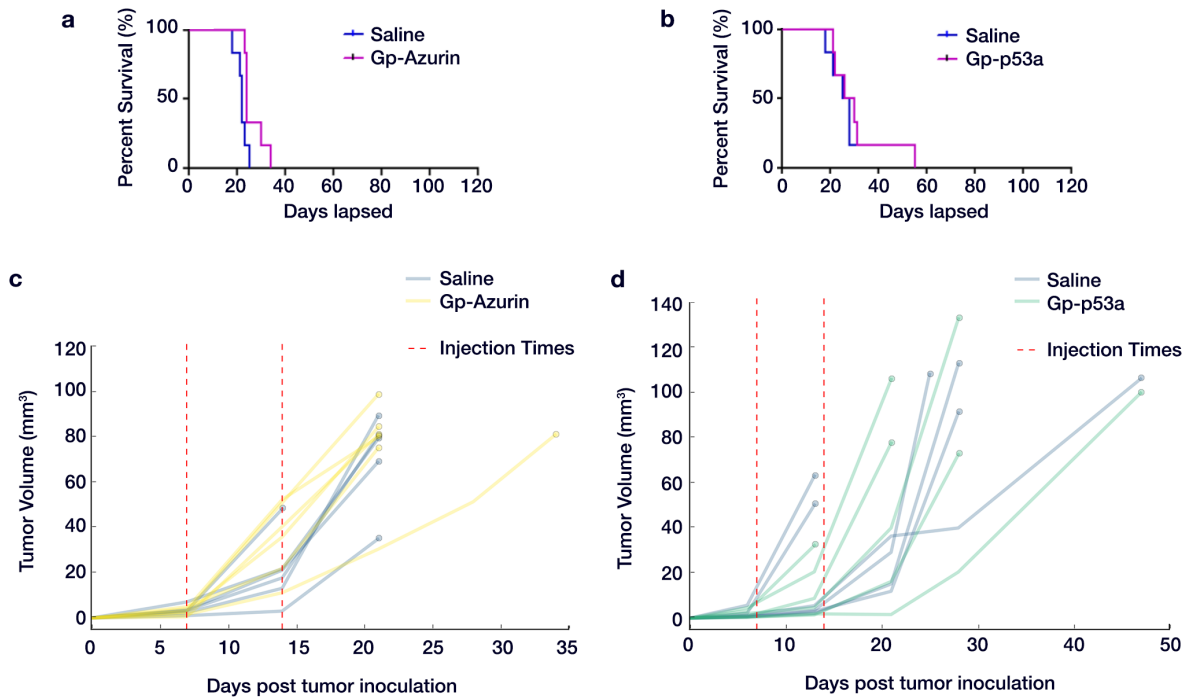

**Supplemental Figure S1.** Kaplan Meier plot for control (n = 6 for each set) and treated rats that were injected with carrier expressing either **(a)** Azurin (n = 6) or **(b)** p53, (n = 6). Results showed no survival in control and treated rat group.  $p$  value = 0.0263 for Azurin survival plot and  $p$  value = 0.6721 for p53 survival plot. **(c)** Tumor volumes calculated from MRI images for control (n = 6) and carrier treated rats expressing *only Azurin* (n = 6). Tumor volume increased exponentially in all control and treated rats. **(d)** Tumor volumes calculated from MRI images for control (n = 6) and carrier treated rats expressing *only p53* (n = 6). Tumor volume increased exponentially in all control and treated rats.

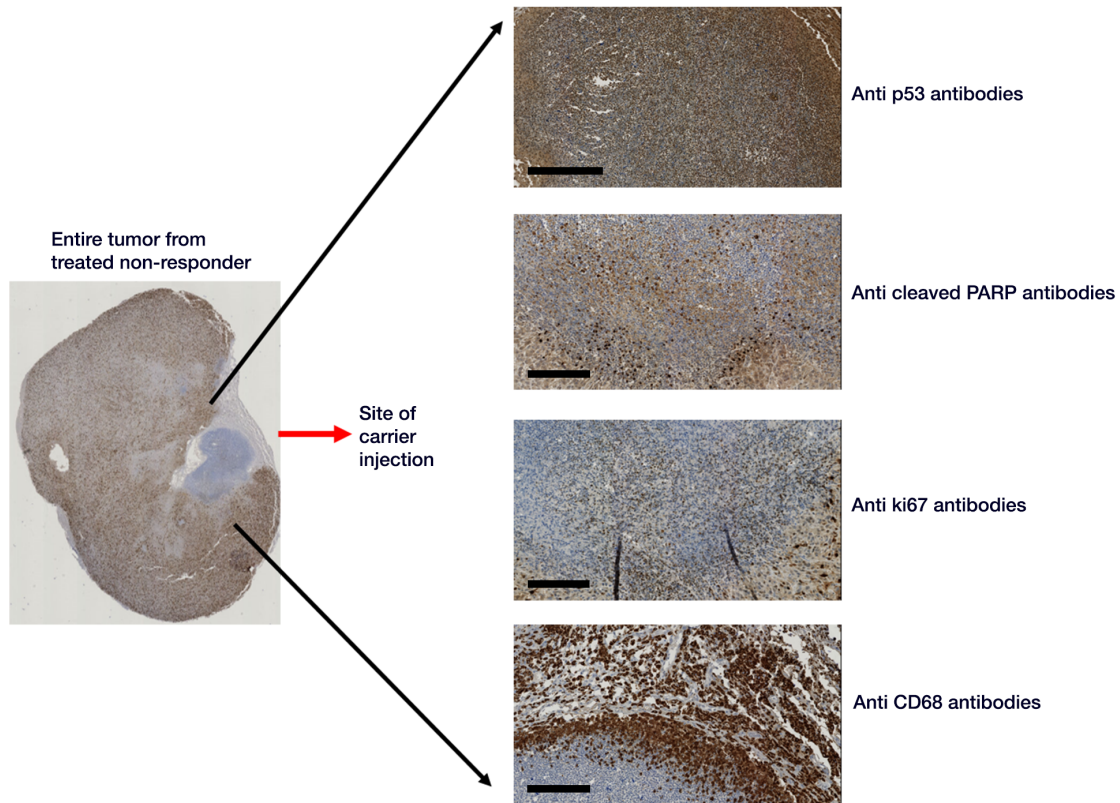

**Supplement Figure S2.** Multiple responses to apoptotic proteins are observed following carrier injection. Near the site of carrier injection, there is increased expression of p53, increase in cleaved PARP (indicator of apoptosis), decrease in ki67 (indicator for cell proliferation), and an increased influx of activated microglia or CD68 positive cells (indicator of innate immune response). In spite of multiple responses, the tumor of non-responders continued to grow possibly because the rate of tumor proliferation exceeded the rate of apoptosis. Picture shown on left is entire tumor from a non-responder rat stained with anti-ki67 antibodies showing high proliferation rate in most part of the tumor except the site of carrier injection. Scale bars: 200  $\mu$ m.

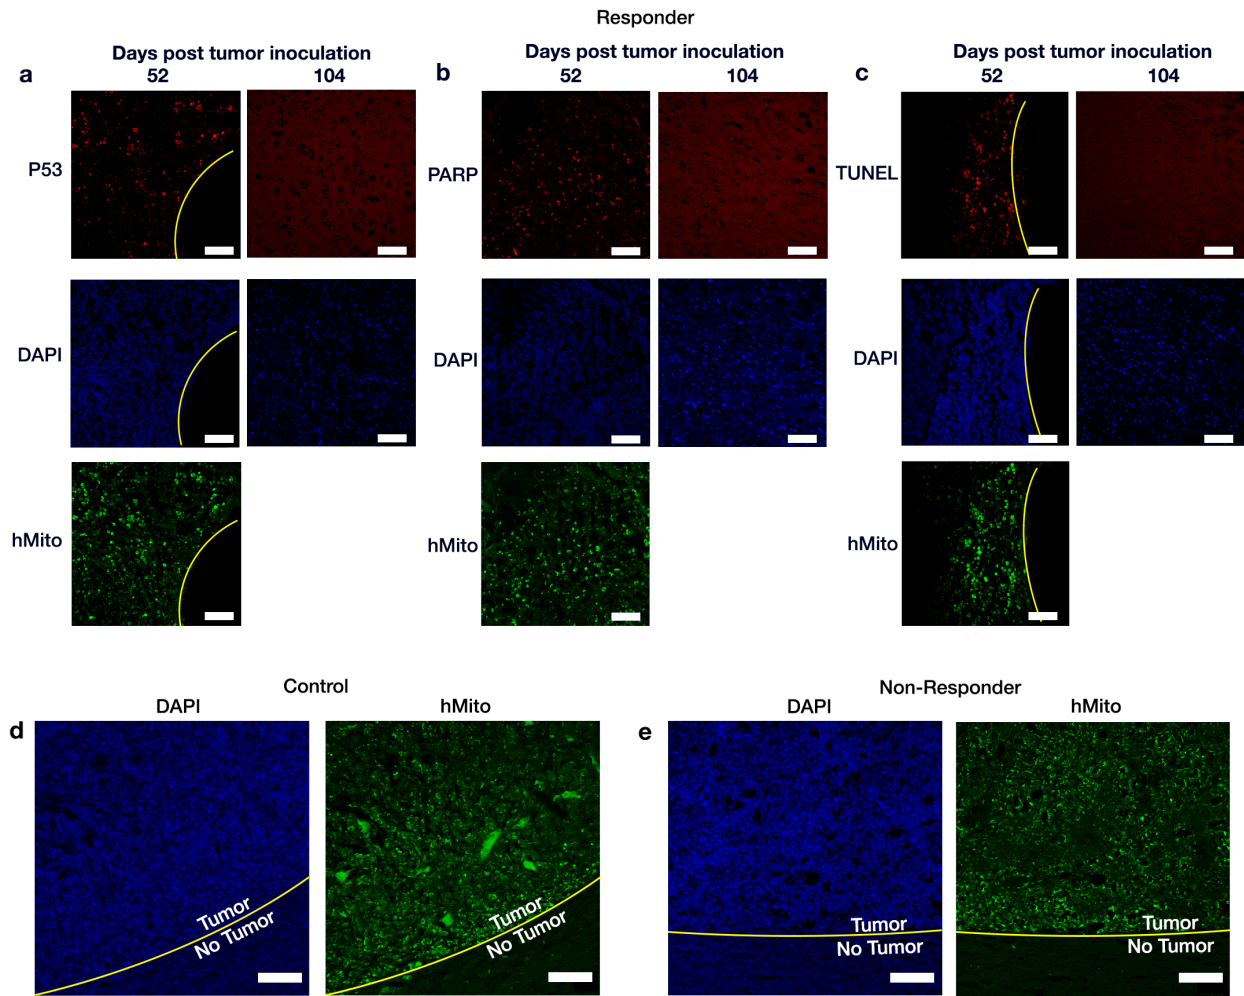

**Supplemental Figure S3.** IHC images of brain sections from treated responder rats euthanized on day 52 post tumor implant or at day 104 to check for presence of **(a)** p53, **(b)** PARP, or **(c)** TUNEL, each stained red above. Green- human anti-mitochondria antibodies which specifically stains tumor cells, Blue-DAPI. The sections show sparsely dispersed tumor cells (green) on day 52. Right side of yellow line - carrier injection site shows a big gap, presumably the site where tumor cells were originally proliferating. In the 52-day section, lot of p53, PARP and TUNEL staining observed exclusively within tumor region. The adjacent healthy cells did not show TUNEL staining indicating absence of apoptosis in this region. In the day 104 sections, p53, PARP and TUNEL staining was negative. There were no glioma cells in all of the responder tissues euthanized on day 104 (**See Fig 6a**), thus no representative human anti-mitochondrial signal for these conditions. Compared to treated responder rats, the tumor population from **(d)** control and **(e)** treated non-responder rats was dense. Yellow lines demarcate intra- and extra-tumoral regions. Scale bars: 100  $\mu$ m.



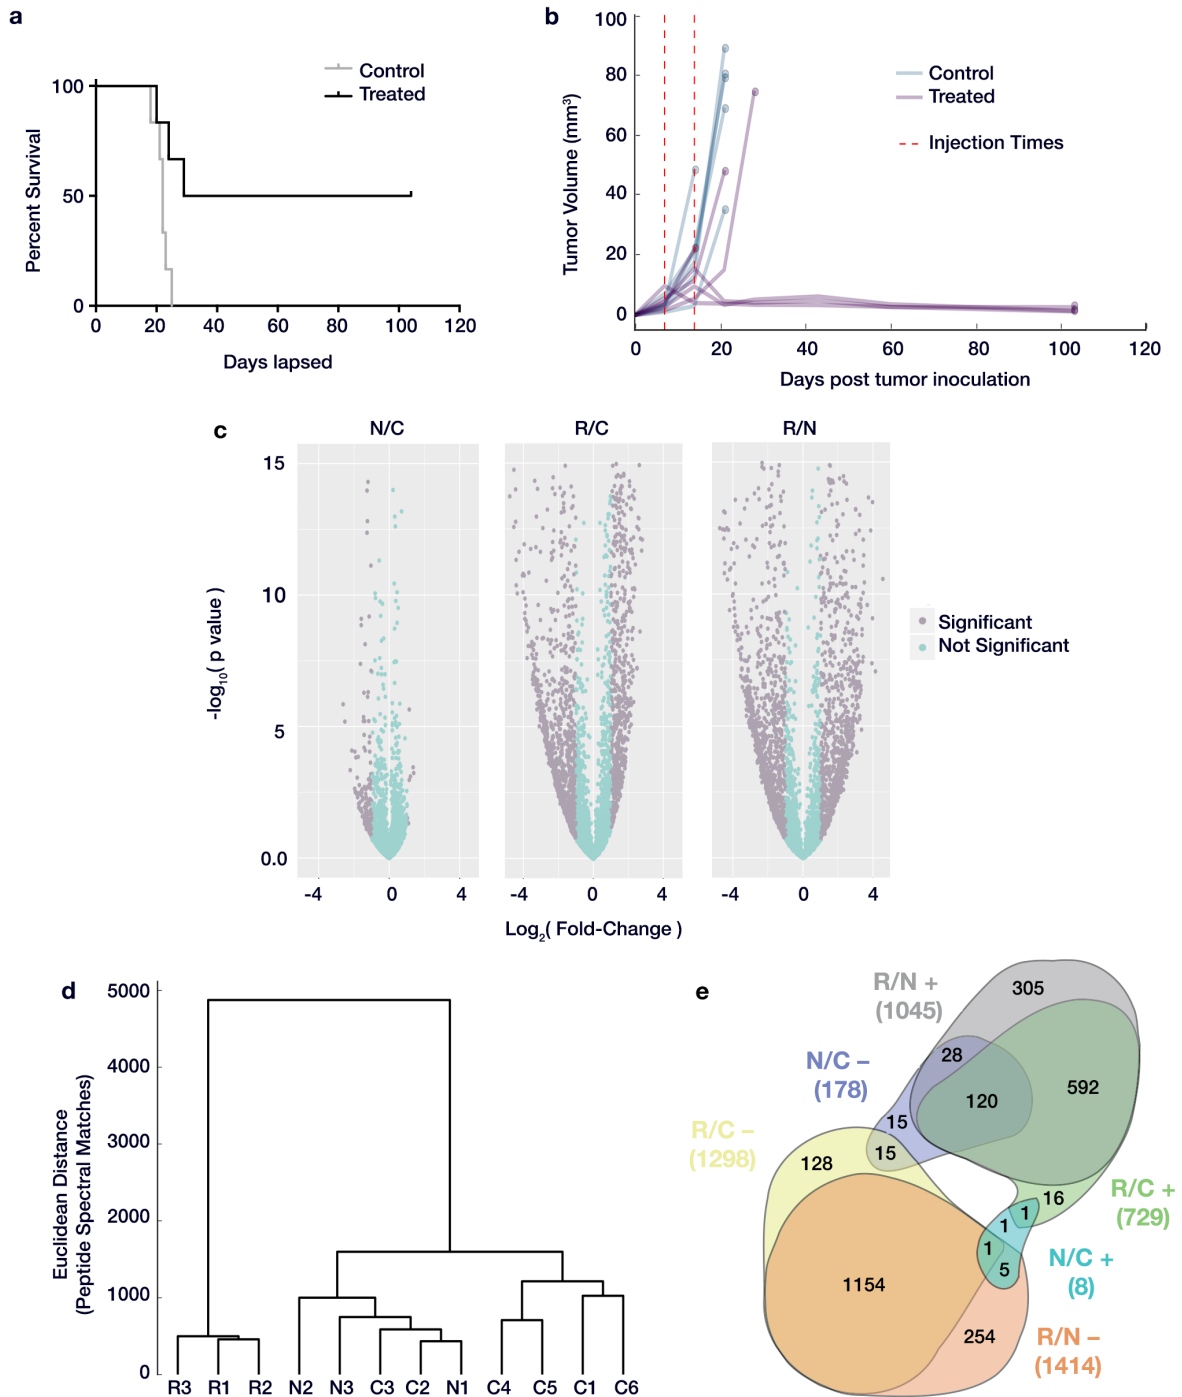

**Supplemental Figure S4.** (a) Survival analysis and (b) tumor volumes for animal cohort used in proteomic analysis (12 animals, 6 control, 3 non-responder, 3 responder). (c) Volcano plots depicting significantly differentially expressed proteins. Each dot represents a unique protein (by uniprot accession). Significant threshold was set to a false discovery rate of  $< 0.05$  and a fold change of greater than  $\pm 2$ -fold. (d) Dendrogram

clustering of proteomics samples by Euclidian distance between peptide spectrum matches across all measured proteins. Note the strong clustering of responders (R1-3), while the non-responders (N1-3) and controls (C1-6) are more closely related in their proteomic signature. (e) Euler Diagram depicting overlapping membership of differentially expressed proteins across the fold-change pairs and further subset by whether this differential expression was relatively an up- or down- fold change. Numbers in parentheses indicate total number of proteins in that particular differential expression subset. R/C is differentially expressed proteins in responders relative to controls, N/C is non-responders relative to controls, and R/N is responders relative to controls, where the sign indicates either +: up- or -: down- fold differential expression.

**Enriched in Responders**

**Enriched in Control**

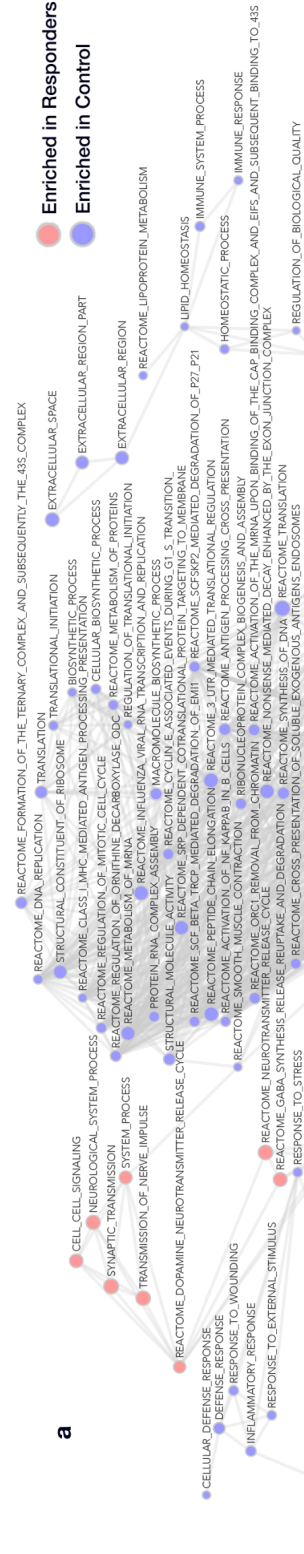

**a**

**Enriched in Non-responders**

**Enriched in Control**

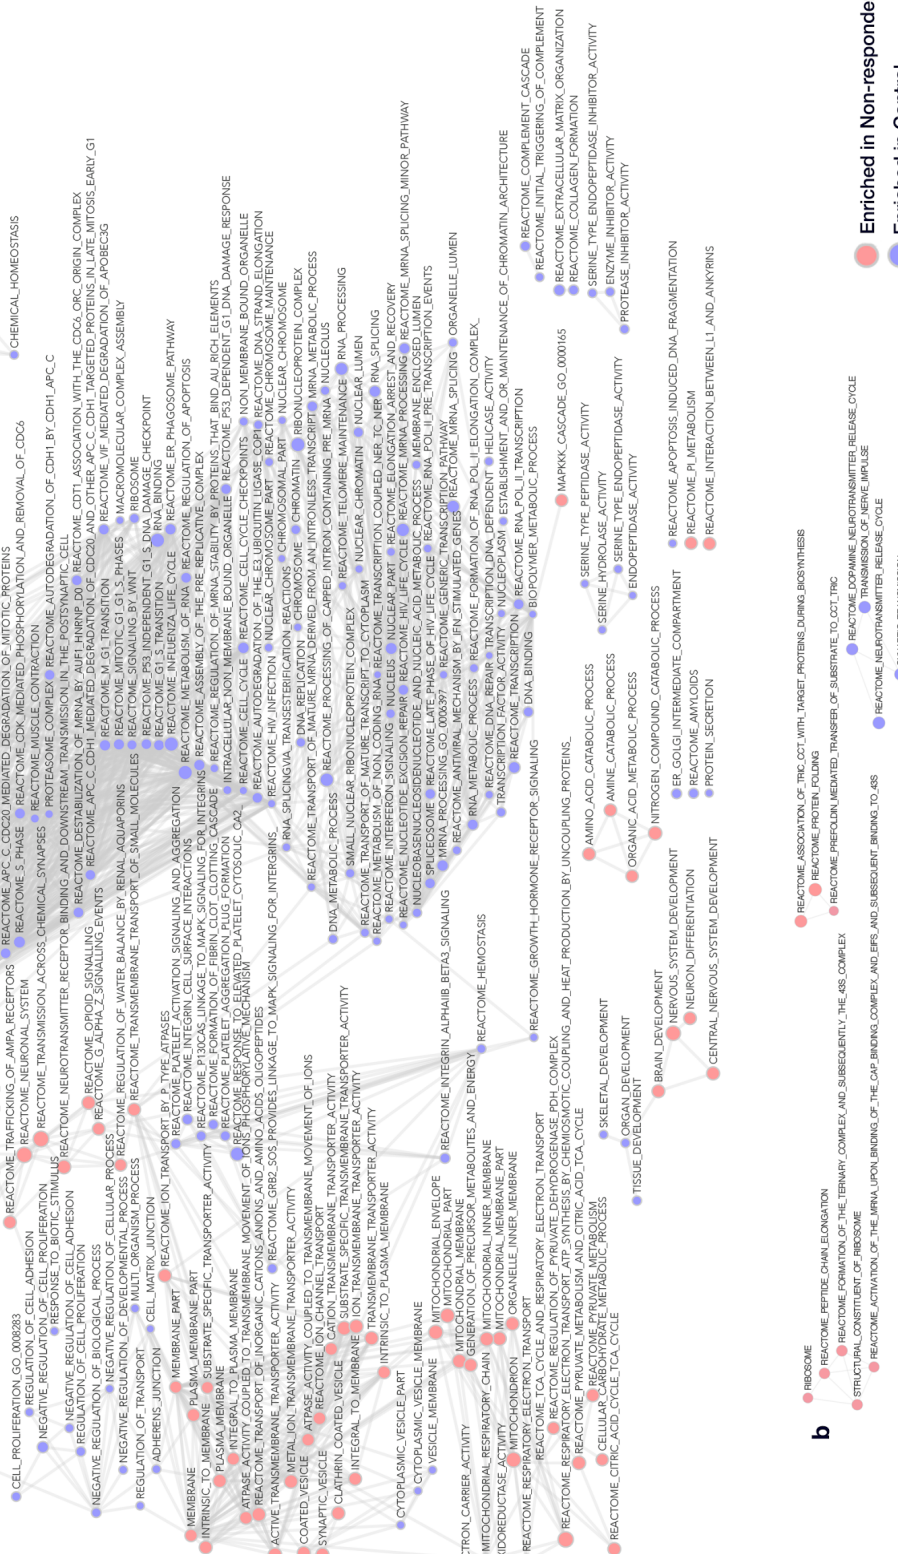

**b**

**Supplemental Figure S5.** GSEA enrichment map for significantly affected pathways (p-value < 0.05, false discovery rate < 25%) in **(A)** responders relative to controls, and **(B)** non-responders relative to control using the Reactome and Gene Ontology datasets. Red dots indicate positively enriched pathways; blue indicates negatively enriched pathways. Relative size maps to relative magnitude of Normalized enrichment score. Edge size corresponds to number of proteins that overlap between gene sets.



**Supplemental Figure S6.** Gene neighborhood network (via BIOGRID and g:profiler) using proteins from apoptosis antibody array. Coloring indicated average protein fold-change for **(a)** non-responders, and **(b)** responders relative to controls using proteomics and western array data. Network has been pruned for visualization for any undetected/unmeasured protein and any node of degree 1 that was not directly connected to p53. Overall this network in non-responders is mixed in regulation, while the responder network is primarily down-regulated relative to controls.



**a****P53 SIGNALING PATHWAY**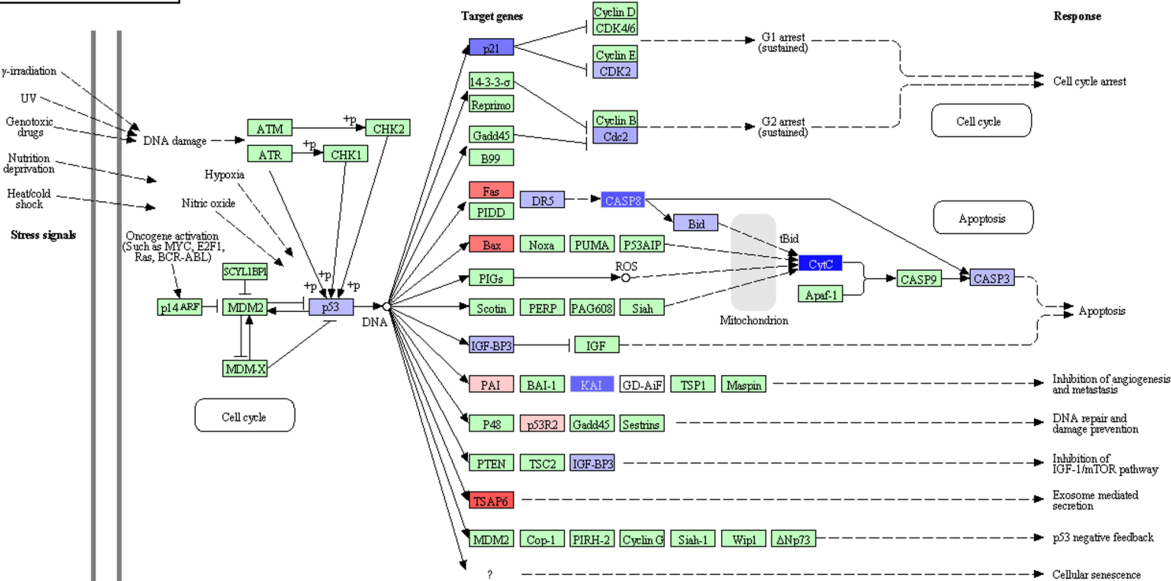04115 12/24/15  
(c) Kanehisa Laboratories**b****APOPTOSIS**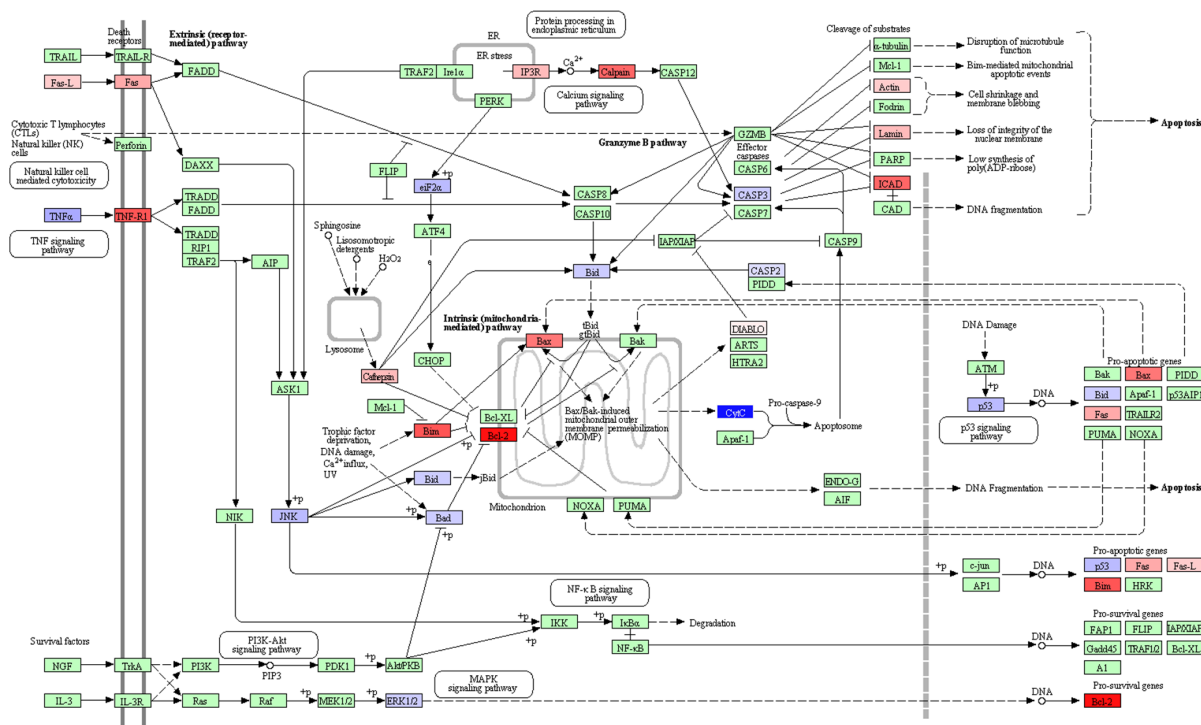04210 3/3/16  
(c) Kanehisa Laboratories

**Supplemental Figure S7.** KEGG **(a)** P53 Signaling (HAS:04115) and **(b)** Apoptosis (HSA:04210) pathways, colored using average non-responder fold-change relative to controls, using proteomics and western array data. No clear pro- or anti-apoptotic signal is apparent from these mappings i.e., both relatively positive and negative expression of proteins occurs for both pro- and anti-apoptotic responses.

**Supplemental Table S1** Primers used for cloning and FISH probe

| <b>Primer Name</b>                         | <b>Primer sequence (5' to 3')</b>      |
|--------------------------------------------|----------------------------------------|
| PfIE-F                                     | ATATACATGTAAACGGCCTCTCTTATTTTC         |
| PfIE-R                                     | ATATAAGCTTCCACTTTACGGATAAACATAACC      |
| p53-F                                      | ATATGGATCCATGGAGGAGCCGCAGTCAGATCC      |
| p53-R                                      | ATATGAATTCTCAGTCTGAGTCAGGCCCTTCTGTC    |
| Azurin-F                                   | ATATGGATCCACGCCGGGCAGATCCCGCTC         |
| Azurin-R                                   | ATATGAATTCTCACTTCAGGGTCAGGGTGCCCTTCATC |
| 23S rDNA FISH<br>probe with 5'Texas<br>Red | AATCACTTCACCTACGTG                     |

**Supplemental Table S2.** Mass spectrometry results for identification of Azurin expression (3 biological replicates). Listed are the results detected as AZUR\_PSEAE (accession: P00282, species: *Pseudomonas aeruginosa*). Azurin-negative controls did not have a detectable gel band for mass spectrometry analysis.

| <b>Sample ID</b> | <b>Sample Group</b> | <b># Unique Peptides</b> | <b>Intensity</b> |
|------------------|---------------------|--------------------------|------------------|
| 5                | Azurin+             | 5                        | 1.20E+08         |
| 6                | Azurin+             | 5                        | 2.10E+08         |
| 7                | Azurin+             | 2                        | 1.40E+07         |

**Supplemental Table S3.** Proteomic individual protein snapshot. Shown are the 20 largest by Log2 Fold Change (Log2 FC) magnitude, up- and down- fold changes between each condition pair. Values below the significance threshold are highlighted in red. Please see **Supplemental Information** for complete dataset.

| Non-responders relative to Controls |           |         |             | Responders relative to Controls |            |         |          | Responders relative to Non-responders |            |         |          |
|-------------------------------------|-----------|---------|-------------|---------------------------------|------------|---------|----------|---------------------------------------|------------|---------|----------|
| UP Fold                             |           |         |             | UP Fold                         |            |         |          | UP Fold                               |            |         |          |
| Gene                                | Accession | Log2 FC | p-value     | Gene                            | Accession  | Log2 FC | p-value  | Gene                                  | Accession  | Log2 FC | p-value  |
| ALDH1A3                             | P47895    | 1.387   | 0.000606033 | Ppp1r9a                         | O35867     | 2.882   | 9.60E-16 | Pclo                                  | Q9JKS6     | 4.549   | 2.80E-11 |
| HSPB6                               | O14558    | 1.35    | 0.000363856 | NEGR1                           | Q7Z3B1     | 2.799   | 8.23E-13 | Bsn                                   | G3V984     | 4.36    | 2.98E-24 |
| ETFA                                | H0YM12    | 1.195   | 0.00080317  | Slc6a17                         | P31662     | 2.758   | 2.17E-12 | Bsn                                   | O88778     | 4.184   | 4.34E-27 |
| SDCBP                               | G5EA09    | 1.143   | 2.26E-06    | Madd                            | O08873     | 2.682   | 7.51E-13 | Gria2                                 | F1LNE4     | 4.139   | 8.54E-08 |
| Itgam                               | G3V8L7    | 1.13    | 0.001078139 | Rap1gap                         | F1LV89     | 2.668   | 2.47E-09 | Tnr                                   | A0A096MJE6 | 3.971   | 3.38E-14 |
| VPS51                               | Q9UID3    | 1.091   | 0.049194741 | Caskin1                         | D3ZE17     | 2.633   | 1.20E-15 | SYNGAP1                               | Q96PV0     | 3.964   | 8.35E-10 |
| Ufc1                                | Q6BBI8    | 1.023   | 0.030357066 | Ppp1r1b                         | Q6J4I0     | 2.603   | 1.29E-13 | Dmxl2                                 | F1M164     | 3.932   | 4.19E-08 |
| Arfgef2                             | Q7TSU1    | 1.002   | 0.034141206 | Negr1                           | Q9Z0J8     | 2.596   | 3.24E-13 | Plcb1                                 | P10687     | 3.857   | 3.91E-13 |
| CCDC124                             | Q96CT7    | 0.999   | 0.009064815 | Ppfia3                          | F1LSE6     | 2.575   | 1.19E-13 | Palm                                  | Q920Q0     | 3.739   | 2.22E-14 |
| Lsm2                                | Q6MG66    | 0.996   | 0.010576147 | PTPRD                           | P23468     | 2.496   | 6.11E-08 | Pde2a                                 | F8WFW5     | 3.66    | 2.62E-10 |
| CTSA                                | X6R5C5    | 0.982   | 0.002856246 | CALB1                           | P05937     | 2.493   | 2.62E-13 | Srcin1                                | Q9QXY2     | 3.543   | 6.77E-20 |
| H1FX                                | Q92522    | 0.972   | 0.05456802  | Cep170b                         | D4A1G8     | 2.488   | 6.05E-08 | Ank2                                  | F1LM42     | 3.529   | 5.92E-36 |
| UQCRH                               | P07919    | 0.966   | 0.022953964 | Agap2                           | Q8CGU4     | 2.416   | 7.21E-12 | Oxr1                                  | Q4V8B0     | 3.505   | 3.76E-11 |
| RRP8                                | O43159    | 0.959   | 0.040943669 | Myef2                           | D4AEI5     | 2.373   | 6.39E-11 | DMXL2                                 | Q8TDI6-3   | 3.453   | 3.49E-12 |
| TUBGCP2                             | Q9BSJ2-4  | 0.95    | 0.02492262  | Scn2a                           | P04775     | 2.349   | 2.21E-14 | Camkv                                 | F1LR80     | 3.45    | 9.14E-13 |
| SRP19                               | P09132    | 0.947   | 0.03322118  | Acs16                           | A0A0A6YYM0 | 2.334   | 2.37E-16 | SYT1                                  | P21579     | 3.445   | 1.50E-35 |
| Emr1                                | Q5Y4N8    | 0.928   | 0.065066637 | Akap12                          | Q5QD51     | 2.327   | 1.12E-14 | Synpo                                 | Q9Z327-2   | 3.432   | 2.44E-08 |
| HNMT                                | P50135    | 0.927   | 0.054959028 | Pclo                            | Q9JKS6     | 2.324   | 1.26E-38 | Camkv                                 | Q63092     | 3.426   | 8.67E-12 |
| Vps53                               | D3ZPE5    | 0.922   | 0.051045151 | Dpp10                           | Q6Q629     | 2.322   | 5.79E-11 | Add2                                  | F8WFS9     | 3.424   | 9.44E-11 |
| Cstf2t                              | M0R6B9    | 0.911   | 0.046867016 | Prkce                           | P09216     | 2.317   | 1.20E-10 | Impact                                | Q5GFD9     | 3.413   | 3.74E-08 |

**Non-responders  
relative to Controls****Responders relative to  
Controls****Responders relative to  
Non-responders****DOWN Fold****DOWN Fold****DOWN Fold**

| <u>Gene</u> | <u>Accession</u> | <u>Log2 FC</u> | <u>p-value</u> | <u>Gene</u> | <u>Accession</u> | <u>Log2 FC</u> | <u>p-value</u> | <u>Gene</u> | <u>Accession</u> | <u>Log2 FC</u> | <u>p-value</u> |
|-------------|------------------|----------------|----------------|-------------|------------------|----------------|----------------|-------------|------------------|----------------|----------------|
| Bsn         | G3V984           | -2.622         | 1.44E-06       | COL6A3      | P12111           | -4.848         | 3.75E-28       | COL6A3      | P12111           | -5.025         | 4.84E-26       |
| Bsn         | O88778           | -2.531         | 6.74E-06       | A1i3        | P14046           | -4.794         | 1.85E-14       | PRKDC       | P78527           | -4.763         | 3.28E-13       |
| Tnr         | A0A096MJE6       | -2.218         | 0.0004623      | PRKDC       | P78527           | -4.561         | 2.65E-13       | ANXA1       | P04083           | -4.596         | 3.56E-13       |
| Pleb1       | P10687           | -2.123         | 8.15E-05       | Mug1        | Q03626           | -4.544         | 1.86E-15       | TGFBI       | Q15582           | -4.528         | 7.52E-14       |
| Pgrmc1      | P70580           | -1.97          | 0.002310608    | TNC         | P24821           | -4.449         | 1.72E-13       | A1i3        | P14046           | -4.516         | 8.03E-13       |
| NCDN        | Q9UBB6-3         | -1.956         | 9.16E-05       | ANXA1       | P04083           | -4.441         | 9.92E-15       | Mug1        | Q03626           | -4.509         | 1.69E-11       |
| Hpcal4      | P35332           | -1.94          | 0.003098431    | NES         | P48681           | -4.425         | 4.68E-12       | NES         | P48681           | -4.473         | 7.03E-12       |
| Scin        | E9PU64           | -1.905         | 0.000154763    | IQGAP1      | P46940           | -4.416         | 4.48E-11       | FBN1        | P35555           | -4.452         | 8.32E-14       |
| Pelo        | Q9JKS6           | -1.889         | 0.003141926    | FN1         | P02751-15        | -4.352         | 8.74E-11       | AHNAK2      | Q8IVF2           | -4.451         | 3.77E-13       |
| Dmxl2       | F1M164           | -1.851         | 0.003603893    | FLNC        | Q14315           | -4.272         | 2.27E-16       | IQGAP1      | P46940           | -4.361         | 3.20E-13       |
| KRT2        | P35908           | -1.816         | 0.000899208    | AHNAK2      | Q8IVF2           | -4.256         | 2.39E-12       | COL6A1      | P12109           | -4.313         | 2.93E-11       |
| Synpo       | Q9Z327           | -1.806         | 0.005110261    | MVP         | Q14764           | -4.115         | 1.74E-19       | TNC         | P24821           | -4.26          | 3.84E-13       |
| Ncdn        | O35095           | -1.765         | 0.000144521    | TGFBI       | Q15582           | -4.056         | 1.83E-11       | LGALS1      | P09382           | -4.26          | 6.71E-56       |
| Synpo       | Q9Z327-2         | -1.74          | 0.008823966    | COL6A1      | P12109           | -4.035         | 8.09E-11       | MVP         | Q14764           | -4.206         | 2.87E-19       |
| Tmod2       | P70566           | -1.728         | 0.003512689    | Iqgap1      | G3V7Q7           | -4.019         | 1.63E-11       | FN1         | P02751-15        | -4.196         | 4.12E-10       |
| Homer1      | Q9Z214           | -1.718         | 0.012052618    | KTN1        | Q86UP2           | -3.971         | 1.85E-11       | CAST        | P20810-6         | -4.19          | 1.24E-11       |
| Gria2       | F1LNE4           | -1.714         | 0.012457946    | A1m         | Q63041           | -3.955         | 1.22E-12       | KTN1        | Q86UP2           | -4.119         | 1.03E-11       |
| Camkv       | Q63092           | -1.704         | 0.001715614    | Hpx         | P20059           | -3.933         | 4.86E-10       | FAM129B     | Q96TA1           | -4.086         | 1.96E-12       |
| Add2        | F8WFS9           | -1.696         | 0.00342469     | CAST        | P20810-6         | -3.928         | 8.33E-10       | PLIN3       | O60664           | -4.028         | 1.16E-10       |
| L1cam       | D3ZPC4           | -1.668         | 0.007714873    | COL6A2      | P12110           | -3.919         | 1.38E-10       | CKAP4       | Q07065           | -4.002         | 1.02E-10       |



**Supplemental Table S4.** Gene Set Enrichment Analysis (GSEA) snapshot. Shown are the 5 largest positively (red) and negatively (blue) enriched pathways for each condition pair, selected by Normalized Enrichment Score (NES) magnitude. ES: Enrichment score; NOM p-val: nominal p-value given by GSEA; FDR: False Discovery Rate; FWER: Family-wise error rate.

|                       | NAME                                                                                                             | SIZE | ES      | NES     | NOM<br>p-val | FDR<br>q-val | FWER<br>p-val |
|-----------------------|------------------------------------------------------------------------------------------------------------------|------|---------|---------|--------------|--------------|---------------|
| <b>Non-responders</b> | PROTEIN FOLDING                                                                                                  | 17   | 0.6480  | 2.4384  | 0.0000       | 0.0186       | 0.0090        |
| relative to           | ASSOCIATION OF TRIC CCT WITH TARGET PROTEINS DURING BIOSYNTHESIS                                                 | 10   | 0.7606  | 2.3412  | 0.0000       | 0.0170       | 0.0170        |
| <b>Controls</b>       | FORMATION OF THE TERNARY COMPLEX AND SUBSEQUENTLY THE 43S COMPLEX                                                | 11   | 0.6838  | 2.1303  | 0.0000       | 0.0788       | 0.1100        |
|                       | PEPTIDE CHAIN ELONGATION                                                                                         | 33   | 0.4547  | 2.1004  | 0.0000       | 0.0797       | 0.1470        |
|                       | STRUCTURAL CONSTITUENT OF RIBOSOME                                                                               | 27   | 0.4858  | 2.0839  | 0.0000       | 0.0735       | 0.1690        |
|                       | TRANSMISSION OF NERVE IMPULSE                                                                                    | 34   | -0.6387 | -1.6677 | 0.0000       | 0.1472       | 0.6770        |
|                       | CLATHRIN COATED VESICLE                                                                                          | 9    | -0.8026 | -1.6971 | 0.0000       | 0.0985       | 0.4820        |
|                       | NEUROTRANSMITTER RELEASE CYCLE                                                                                   | 16   | -0.7191 | -1.7001 | 0.0021       | 0.1114       | 0.4680        |
|                       | SECOND MESSENGER MEDIATED SIGNALING                                                                              | 14   | -0.7356 | -1.7007 | 0.0011       | 0.1365       | 0.4610        |
|                       | SYNAPTIC TRANSMISSION                                                                                            | 30   | -0.6641 | -1.7201 | 0.0000       | 0.1147       | 0.3260        |
| <b>Responders</b>     | TCA CYCLE AND RESPIRATORY ELECTRON TRANSPORT                                                                     | 74   | 0.5741  | 2.3851  | 0.0000       | 0.0000       | 0.0000        |
| relative to           | TRANSMISSION ACROSS CHEMICAL SYNAPSES                                                                            | 60   | 0.5787  | 2.2875  | 0.0000       | 0.0000       | 0.0000        |
| <b>Controls</b>       | NEURONAL SYSTEM                                                                                                  | 66   | 0.5587  | 2.2337  | 0.0000       | 0.0000       | 0.0000        |
|                       | RESPIRATORY ELECTRON TRANSPORT ATP SYNTHESIS BY CHEMIOSMOTIC COUPLING AND HEAT PRODUCTION BY UNCOUPLING PROTEINS | 49   | 0.5782  | 2.2141  | 0.0000       | 0.0000       | 0.0000        |
|                       | MITOCHONDRION                                                                                                    | 114  | 0.4766  | 2.1351  | 0.0000       | 0.0003       | 0.0020        |
|                       | NONSENSE MEDIATED DECAY ENHANCED BY THE EXON JUNCTION COMPLEX                                                    | 35   | -0.7143 | -2.8738 | 0.0000       | 0.0000       | 0.0000        |
|                       | PEPTIDE CHAIN ELONGATION                                                                                         | 33   | -0.7578 | -2.8885 | 0.0000       | 0.0000       | 0.0000        |
|                       | INFLUENZA VIRAL RNA TRANSCRIPTION AND REPLICATION                                                                | 34   | -0.7467 | -2.8986 | 0.0000       | 0.0000       | 0.0000        |
|                       | 3 UTR MEDIATED TRANSLATIONAL REGULATION                                                                          | 36   | -0.7423 | -2.9374 | 0.0000       | 0.0000       | 0.0000        |

|                       | NAME                                                                 | SIZE | ES      | NES     | NOM<br>p-val | FDR<br>q-val | FWER<br>p-val |
|-----------------------|----------------------------------------------------------------------|------|---------|---------|--------------|--------------|---------------|
| <b>Responders</b>     | NEUROTRANSMITTER RELEASE CYCLE                                       | 17   | 0.7612  | 2.0635  | 0.0000       | 0.0031       | 0.0040        |
| relative to           | ACTIVE TRANSMEMBRANE TRANSPORTER ACTIVITY                            | 30   | 0.6512  | 1.9963  | 0.0000       | 0.0062       | 0.0150        |
| <b>Non-responders</b> | NEURONAL SYSTEM                                                      | 69   | 0.5640  | 1.9732  | 0.0000       | 0.0065       | 0.0230        |
|                       | SYNAPTIC TRANSMISSION                                                | 31   | 0.6445  | 1.9725  | 0.0000       | 0.0049       | 0.0230        |
|                       | TCA CYCLE AND RESPIRATORY ELECTRON TRANSPORT                         | 77   | 0.5515  | 1.9322  | 0.0000       | 0.0071       | 0.0440        |
|                       | REACTOME 3 UTR MEDIATED TRANSLATIONAL REGULATION                     | 36   | -0.7416 | -3.0801 | 0.0000       | 0.0000       | 0.0000        |
|                       | REACTOME INFLUENZA VIRAL RNA TRANSCRIPTION AND REPLICATION           | 34   | -0.7420 | -3.0824 | 0.0000       | 0.0000       | 0.0000        |
|                       | REACTOME SRP DEPENDENT COTRANSLATIONAL PROTEIN TARGETING TO MEMBRANE | 39   | -0.7320 | -3.0827 | 0.0000       | 0.0000       | 0.0000        |
|                       | REACTOME INFLUENZA LIFE CYCLE                                        | 45   | -0.7101 | -3.1372 | 0.0000       | 0.0000       | 0.0000        |
|                       | REACTOME TRANSLATION                                                 | 52   | -0.7248 | -3.2511 | 0.0000       | 0.0000       | 0.0000        |
